# Supplementary material for: Impact of HIF prolyl hydroxylase inhibitors in heart failure patients with renal anemia
Source: PubMed Central journal article supplement (PMC10905796; doi:10.1186/s13104-024-06726-7), 2024-03-01
Supplement: 13104_2024_6726_MOESM1_ESM.pdf [file 13104_2024_6726_MOESM1_ESM.pdf]

**Figure S1**

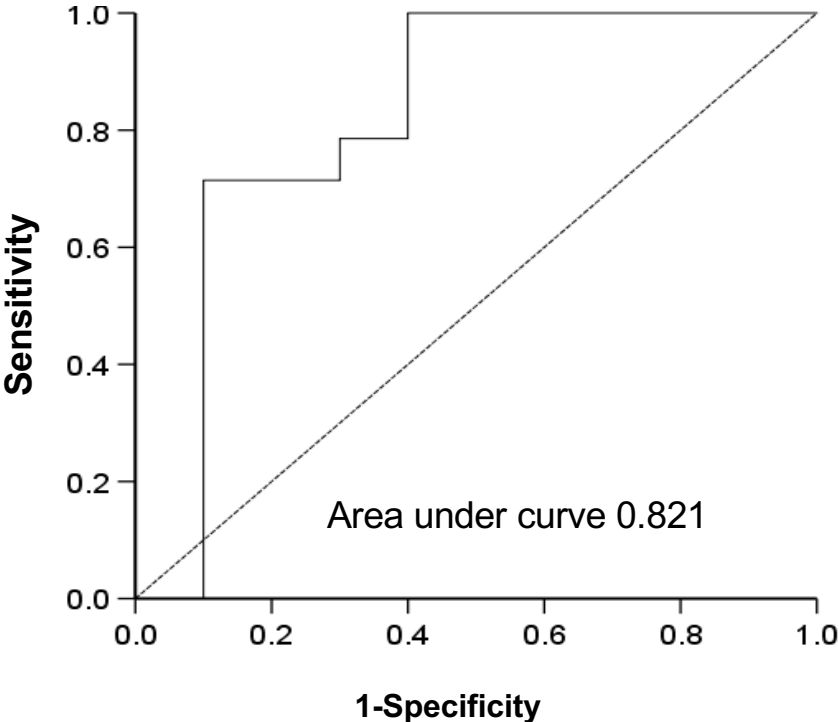

**Figure S2**

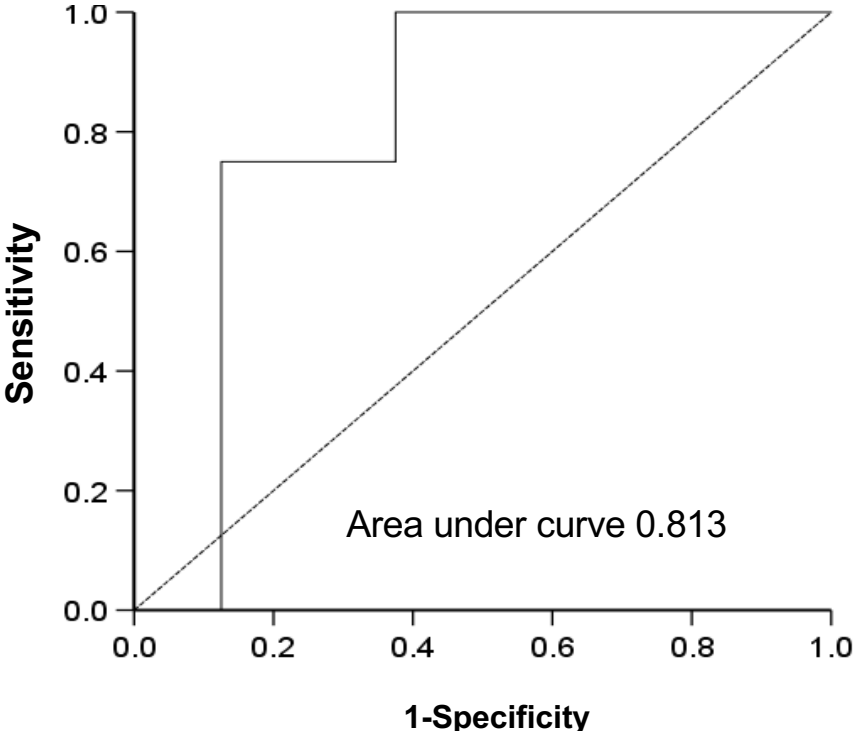

Receiver operating characteristic curve for (Figure S1) ferritin level at baseline and (Figure S2) TSAT value at 1 month after the start of HIF-PH inhibitor treatment.

**Figure S1 and S2**
