# Supplementary material for: Impact of HIF prolyl hydroxylase inhibitors in heart failure patients with renal anemia
Source: PubMed Central journal article supplement (PMC10905796; doi:10.1186/s13104-024-06726-7), 2024-03-01
Supplement: 13104_2024_6726_MOESM2_ESM.pdf [file 13104_2024_6726_MOESM2_ESM.pdf]

**Table S1. Comorbidities and Medication (n=32)**

| <b>Comorbidities -No.(%)</b> |         |
|------------------------------|---------|
| Hypertension                 | 23 (72) |
| Dyslipidemia                 | 26 (82) |
| Diabetes                     | 15 (47) |
| Stroke                       | 3 (9)   |
| Coronary Artery Disease      | 16 (50) |
| Atrial Fibrillation          | 12 (38) |
| <b>Medication -No.(%)</b>    |         |
| ESA                          | 12 (38) |
| Sodium ferrous citrate       | 11 (34) |
| Antiplatelet                 | 15 (47) |
| Anticoagulant                | 17 (53) |
| Statin                       | 28 (87) |
| ARNI                         | 7 (22)  |
| ACE inhibitors/ARBs          | 16 (50) |
| $\beta$ -blocker             | 20 (63) |
| Calcium Channel Blocker      | 14 (44) |
| SGLT2i                       | 11 (34) |
| Diuretic                     | 29 (91) |
| Tolvaptan                    | 19 (59) |
| Loop diuretic                | 22 (69) |
| Aldosterone Blocker          | 15 (47) |

ESA:erythropoiesis-stimulating agent, ARNI: Angiotensin receptor-Neprilysin inhibitor, ACE, angiotensin-converting enzyme; ARBs, angiotensin receptor blockers.

**Table S2. Patient characteristics according to changes in NT-proBNP**

|                                   | <b>Responder</b> | <b>Non-Responder</b> | <b>p-value</b> |
|-----------------------------------|------------------|----------------------|----------------|
| Age (years)                       | 83±4             | 80±7                 | 0.07           |
| Male/Female                       | 10/6             | 10/6                 | 1.00           |
| BMI (kg/cm <sup>2</sup> )         | 22±3             | 23±3                 | 0.54           |
| systolic BP (mmHg)                | 125±21           | 116±21               | 0.27           |
| diastolic BP (mmHg)               | 61±13            | 59±10                | 0.64           |
| EF (%)                            | 59.5±10.9        | 53.8±13.6            | 0.12           |
| HF <sub>r</sub> EF -no.(%)        | 1 (6)            | 4 (25)               | 0.95           |
| HF <sub>mr</sub> EF -no.(%)       | 2 (13)           | 2 (13)               |                |
| HF <sub>p</sub> EF -no.(%)        | 13 (81)          | 10 (63)              |                |
| Hypertensions -no.(%)             | 12 (75)          | 11 (68)              | 0.69           |
| Dyslipidemia -no.(%)              | 12 (75)          | 14 (88)              | 0.34           |
| Diabetes -no.(%)                  | 6 (38)           | 9 (56)               | 0.29           |
| Stroke -no.(%)                    | 2 (13)           | 1 (6)                | 0.60           |
| Coronary Artery disease -no.(%)   | 7 (44)           | 9 (56)               | 0.70           |
| Atrial Fibrillation -no.(%)       | 7 (44)           | 5 (31)               | 0.72           |
| ESA -no.(%)                       | 7 (44)           | 5 (31)               | 0.72           |
| Sodium ferrous citrate -no.(%)    | 7 (44)           | 4 (25)               | 0.49           |
| Hb (g/dl)                         | 9.9±1.2          | 10.6±1.4             | 0.15           |
| Hct (%)                           | 31.0±3.8         | 33.1±4.2             | 0.15           |
| TSAT (%)                          | 27.1±6.7         | 21.7±9.3             | 0.10           |
| Ferritin (ng/ml)                  | 178.7±126.0      | 94.5±156.5           | 0.18           |
| CRP (mg/dl)                       | 1.5±3.9          | 0.2±0.5              | 0.20           |
| BUN (mg/dl)                       | 30.8±11.0        | 31.7±11.0            | 0.83           |
| Cre (mg/dl)                       | 1.5±0.5          | 1.7±0.8              | 0.36           |
| eGFR (mL/min/1.73m <sup>2</sup> ) | 35.0±12.7        | 31.2±10.0            | 0.35           |
| Na (mEq/l)                        | 139.1±3.8        | 138.5±4.5            | 0.70           |
| K (mEq/l)                         | 4.3±0.5          | 4.5±0.3              | 0.25           |
| NT-proBNP (pg/ml)                 | 1553 (871-3254)  | 867 (454-1502)       | 0.17           |
